# Supplementary material for: Oxidative Stress in the Muscles of the Fish Nile Tilapia Caused by Zinc Oxide Nanoparticles and Its Modulation by Vitamins C and E
Source: Hindawi journal article supplement (doi:10.1155/2018/6926712), 2018-01-01
Supplement: f1 [file 6926712.f1.pdf]

538 **Supplemental Table (1):** The actual ZnONPs concentrations (mg/ L) in the exposure water.

| Concentrations<br>(mg/ L)   | Time (hours) |            |            |
|-----------------------------|--------------|------------|------------|
|                             | Zero         | 12         | 24         |
| <b>1<sup>st</sup> group</b> | Nd           | Nd         | Nd         |
| <b>2<sup>nd</sup> group</b> | 1±0.003      | 0.96±0.003 | 0.92±0.001 |
| <b>3<sup>rd</sup> group</b> | 2±0.005      | 1.98±0.006 | 1.95±0.004 |
| <b>4<sup>th</sup> group</b> | 1±0.003      | 0.93±0.003 | 0.90±0.001 |
| <b>5<sup>th</sup> group</b> | 2±0.004      | 1.96±0.006 | 1.93±0.004 |

539 Nd= not detected

540

541
